# Supplementary material for: Deciphering the Transcriptomic Landscape of Type 2 Diabetes: Insights from Bulk RNA Sequencing and Single-Cell Analysis
Source: bioRxiv or medRxiv preprint supplement (doi:10.1101/2024.11.06.24316740), 2024-11-08

Original samples

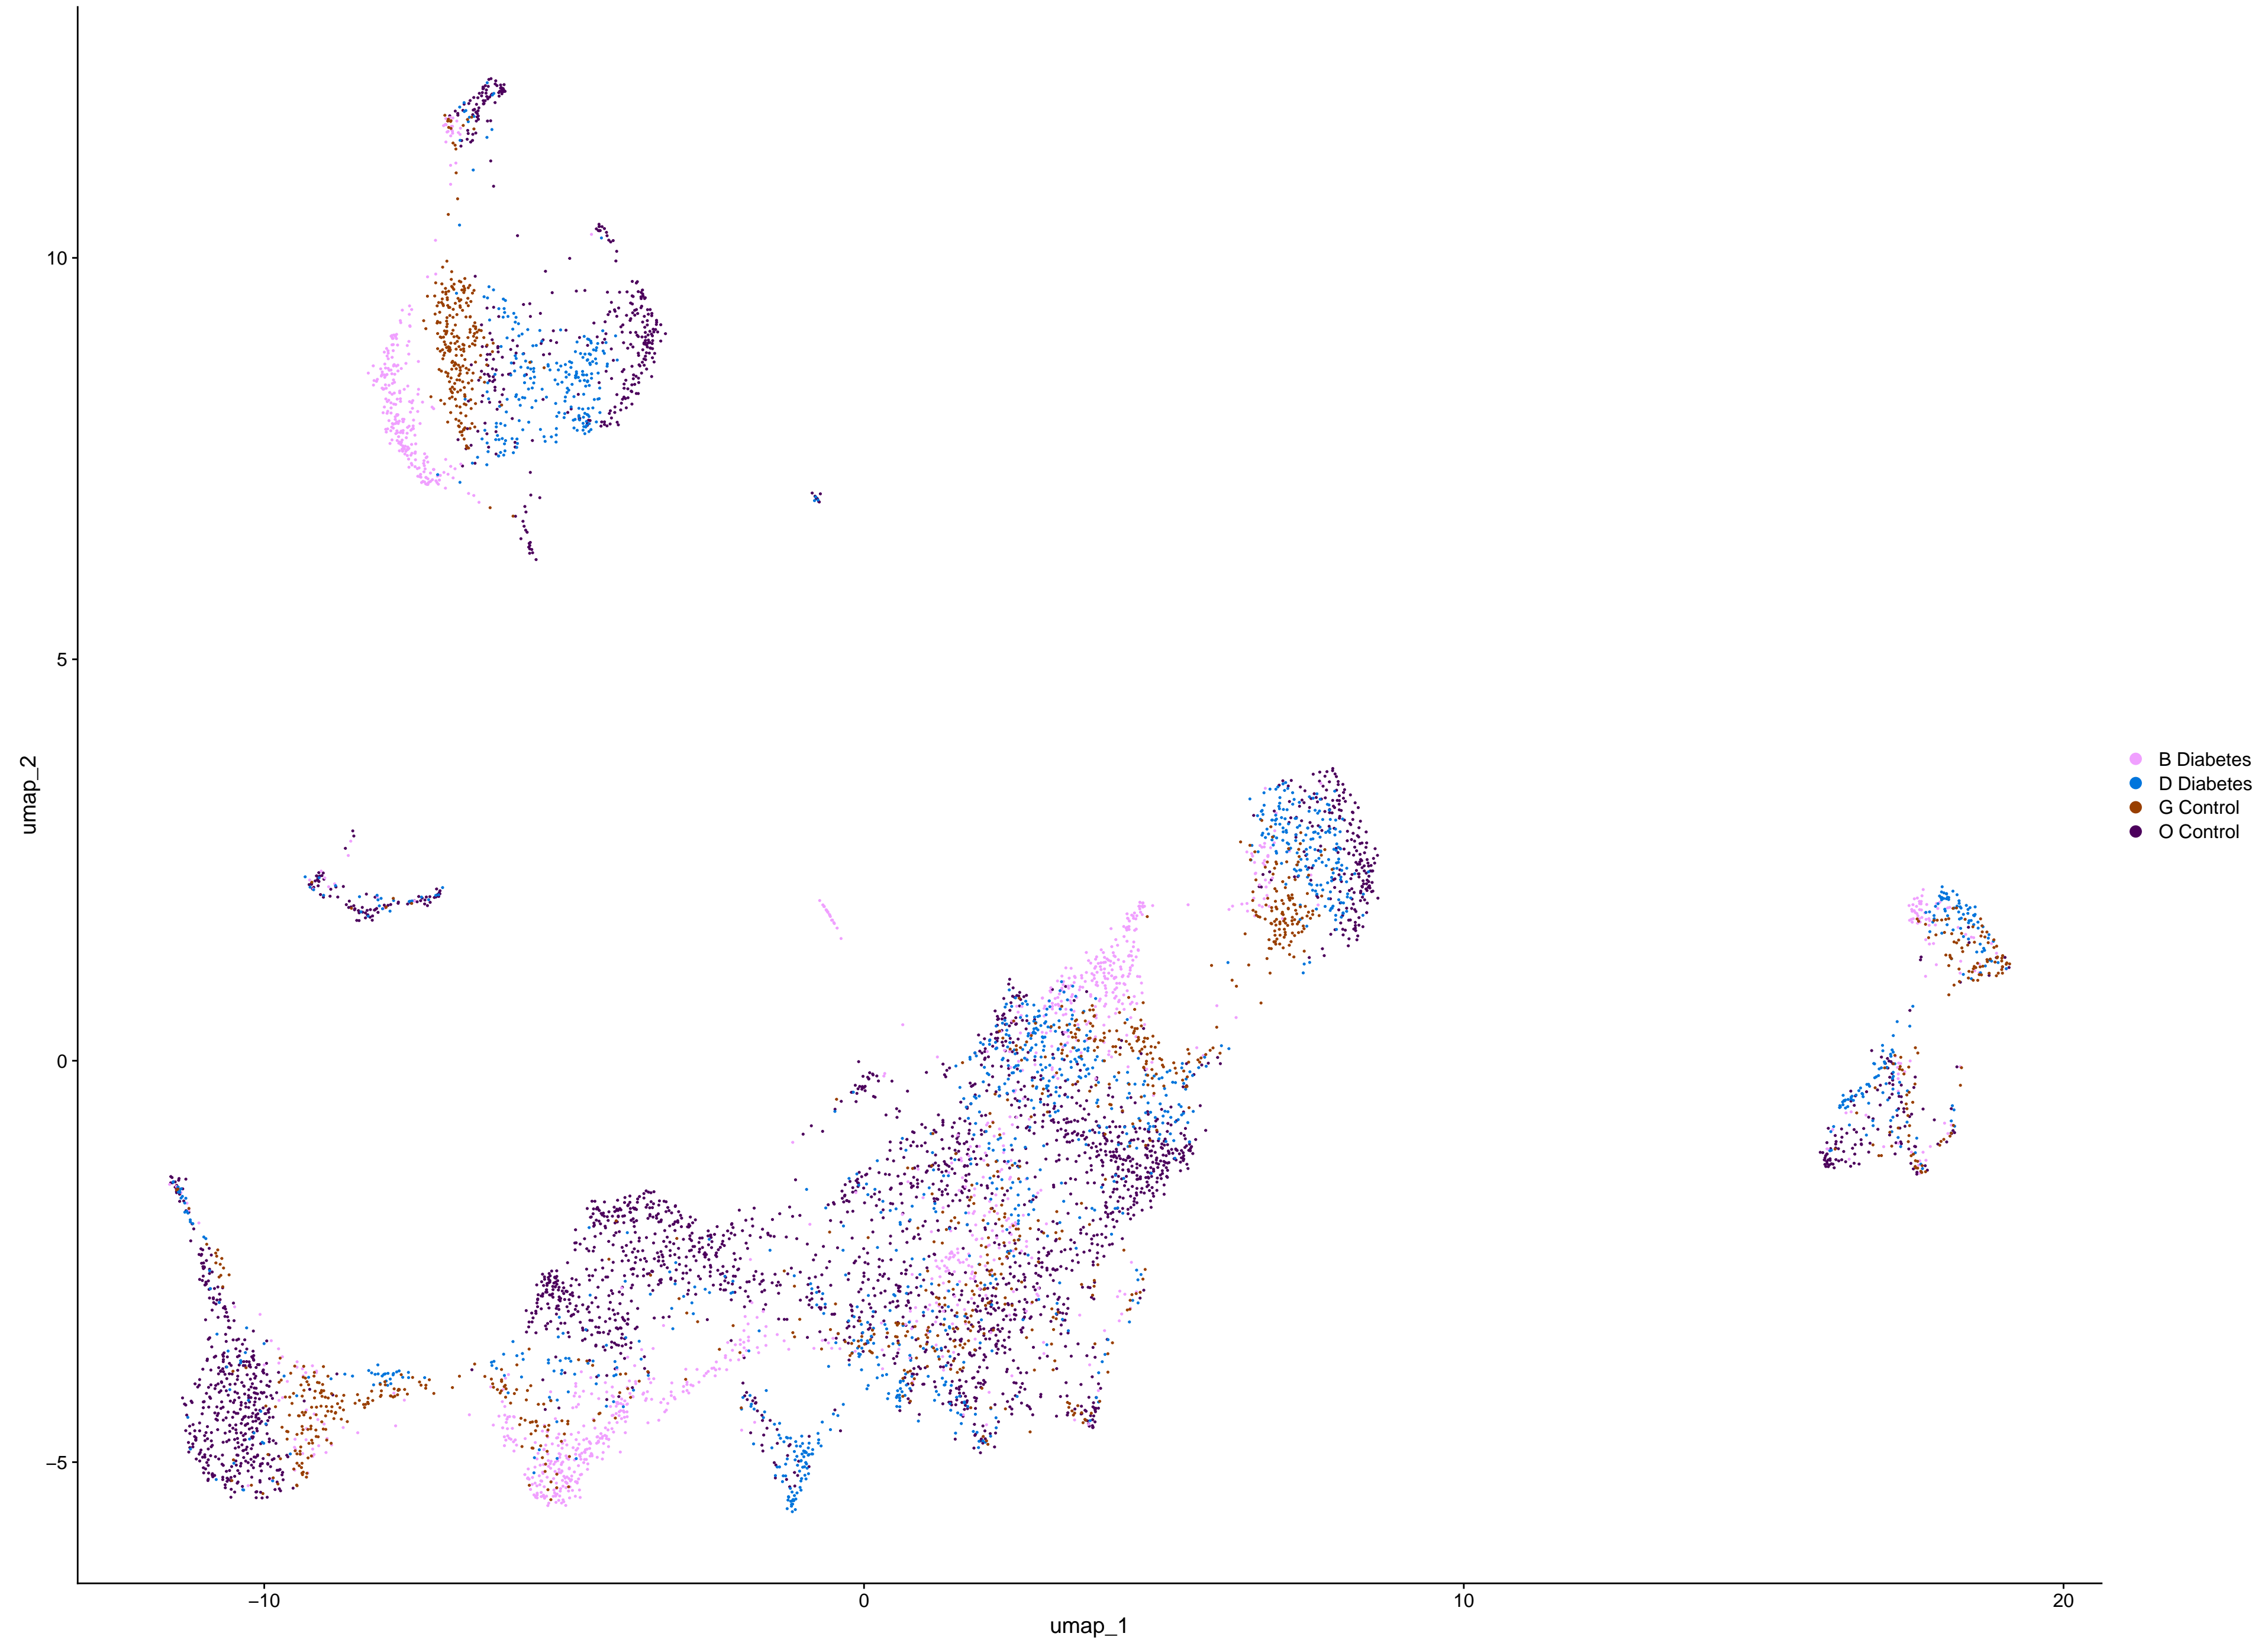

Supplement: Supplementary file [file media-1.pdf]
